# Supplementary material for: Work functioning among young adults: the role of mental health problems from childhood to young adulthood
Source: HighWire-hosted journal article supplement (doi:10.1136/oemed-2021-107819), 2021-10-28
Supplement: oemed-2021-107819supp001_data_supplement.pdf [file oemed-2021-107819supp001_data_supplement.pdf]

## Appendix

Table A1: WRFQ 2.0 sample description (N=1055)

|                              | Valid N    | Not applicable N (%) | Missing N (%) | Mean (SD)     | Range    | Cronbach's $\alpha^*$ |
|------------------------------|------------|----------------------|---------------|---------------|----------|-----------------------|
| <b>WSOD</b>                  | <b>899</b> | 105 (10.0)           | 52 (4.9)      | 85.43 (18.31) | 0-100    | 0.79                  |
| Start as soon as you arrived | <b>932</b> | 72 (6.8)             | 51 (4.8)      | 86.88 (21.96) |          |                       |
| Work without mistakes        | <b>946</b> | 57 (5.4)             | 52 (4.9)      | 85.15 (21.82) |          |                       |
| Work fast enough             | <b>934</b> | 70 (6.6)             | 51 (4.8)      | 83.24 (23.01) |          |                       |
| <b>PD</b>                    | <b>724</b> | 280 (26.5)           | 51 (4.8)      | 88.97 (19.76) | 0-100    | 0.87                  |
| Stay in one position         | <b>909</b> | 95 (9.0)             | 51 (4.8)      | 86.96 (23.71) |          |                       |
| Repeat the same motions      | <b>791</b> | 213 (20.2)           | 51 (4.8)      | 88.53 (22.30) |          |                       |
| Bend, twist or reach         | <b>793</b> | 211 (20.0)           | 51 (4.8)      | 89.60 (22.10) |          |                       |
| <b>MSD</b>                   | <b>956</b> | 48 (4.6)             | 51 (4.8)      | 80.57 (22.81) | 0-100    | 0.82                  |
| Do work carefully            | <b>961</b> | 43 (4.1)             | 51 (4.8)      | 84.63 (24.41) |          |                       |
| Concentrate on work          | <b>965</b> | 39 (3.7)             | 51 (4.8)      | 76.30 (25.20) |          |                       |
| <b>FD</b>                    | <b>947</b> | 57 (5.4)             | 51 (4.8)      | 80.78 (24.10) | 0-100    | 0.88                  |
| Set priorities               | <b>959</b> | 45 (4.3)             | 51 (4.8)      | 80.68 (25.34) |          |                       |
| Perform multiple tasks       | <b>956</b> | 48 (4.5)             | 51 (4.8)      | 80.96 (25.73) |          |                       |
| <b>Total score</b>           | <b>914</b> | 89 (8.4)             | 52 (4.9)      | 84.30 (17.23) | 2.50-100 | 0.91                  |

\*Alphas calculated in SPSS (listwise deletion)
