# Supplementary material for: Work functioning among young adults: the role of mental health problems from childhood to young adulthood
Source: HighWire-hosted journal article supplement (doi:10.1136/oemed-2021-107819), 2021-10-28
Supplement: oemed-2021-107819supp002_data_supplement.pdf [file oemed-2021-107819supp002_data_supplement.pdf]

## Supplemental material

Table S1: Regression analyses of trajectories of internalising and externalising problems from age 11 to age 26 on the subscales of work functioning at age 29:

|                                          | Work Role Functioning |            |                |            |                |            |                |            |
|------------------------------------------|-----------------------|------------|----------------|------------|----------------|------------|----------------|------------|
|                                          | WSOD                  |            | PD             |            | MSD            |            | FD             |            |
|                                          | Beta                  | SE         | Beta           | SE         | Beta           | SE         | Beta           | SE         |
| Intercept                                | <b>82.5***</b>        | <b>3.4</b> | <b>76.1***</b> | <b>3.4</b> | <b>74.7***</b> | <b>4.3</b> | <b>79.6***</b> | <b>4.5</b> |
| Internalising problems (ref. low-stable) |                       |            |                |            |                |            |                |            |
| High-stable                              | <b>-9.5***</b>        | <b>1.8</b> | <b>-4.4*</b>   | <b>1.7</b> | <b>-9.2***</b> | <b>2.2</b> | <b>-9.4***</b> | <b>2.3</b> |
| Moderate-stable                          | <b>-3.8*</b>          | <b>1.7</b> | -0.8           | 1.6        | -4.0           | 2.1        | -1.7           | 2.2        |
| Decreasing                               | <b>-3.2*</b>          | <b>1.6</b> | -0.6           | 1.5        | <b>-3.9*</b>   | <b>2.0</b> | <b>-4.8*</b>   | <b>2.1</b> |
| Age (0 = mean)                           | -1.5                  | 1.0        | -0.9           | 0.9        | <b>-2.6*</b>   | <b>1.2</b> | <b>-2.6*</b>   | <b>1.3</b> |
| Sex (ref. female)                        | -2.1                  | 1.2        | -0.1           | 1.2        | -1.9           | 1.5        | <b>-3.3*</b>   | <b>1.6</b> |
| Physical health                          | <b>1.6*</b>           | <b>0.8</b> | <b>1.5*</b>    | <b>0.8</b> | 1.5            | 1.0        | 1.2            | 1.0        |
| Educational level (ref. low)             |                       |            |                |            |                |            |                |            |
| Medium                                   | <b>4.1*</b>           | <b>2.1</b> | <b>9.2***</b>  | <b>2.0</b> | <b>7.0**</b>   | <b>2.6</b> | 3.0            | 2.8        |
| High                                     | 3.2                   | 2.1        | <b>13.6***</b> | <b>2.0</b> | <b>7.2**</b>   | <b>2.6</b> | <b>4.7*</b>    | <b>2.7</b> |
| Intercept                                | <b>80.1***</b>        | <b>3.4</b> | <b>76.4***</b> | <b>3.3</b> | <b>73.6***</b> | <b>4.2</b> | <b>77.8***</b> | <b>4.5</b> |
| Externalising problems (ref. low-stable) |                       |            |                |            |                |            |                |            |
| High-stable                              | <b>-7.6***</b>        | <b>1.8</b> | <b>-3.7*</b>   | <b>1.7</b> | <b>-7.3***</b> | <b>2.2</b> | <b>-8.1***</b> | <b>2.3</b> |
| Moderate-stable                          | <b>-4.5**</b>         | <b>1.6</b> | <b>-3.9*</b>   | <b>1.5</b> | <b>-6.5***</b> | <b>2.0</b> | <b>-4.5*</b>   | <b>2.1</b> |
| Decreasing                               | -2.4                  | 1.6        | -2.0           | 1.5        | <b>-4.6*</b>   | <b>2.0</b> | -3.4           | 2.1        |
| Age (0 = mean)                           | -1.4                  | 1.0        | -0.8           | 0.9        | <b>-2.3*</b>   | <b>1.2</b> | -2.2           | 1.3        |
| Sex (ref. female)                        | -0.3                  | 1.2        | 0.6            | 1.1        | -0.1           | 1.5        | -1.2           | 1.5        |
| Physical health                          | <b>2.1**</b>          | <b>0.8</b> | <b>1.7*</b>    | <b>0.8</b> | <b>1.9*</b>    | <b>1.0</b> | 1.5            | 1.0        |
| Educational level (ref. low)             |                       |            |                |            |                |            |                |            |
| Medium                                   | 3.5                   | 2.1        | <b>9.0***</b>  | <b>2.1</b> | <b>6.5*</b>    | <b>2.6</b> | 2.7            | 2.8        |
| High                                     | 2.7                   | 2.1        | <b>13.5***</b> | <b>2.0</b> | <b>6.8**</b>   | <b>2.6</b> | <b>4.5</b>     | <b>2.7</b> |

\*\*\*:  $p \leq 0.001$  \*\*:  $p \leq 0.01$  \*:  $p \leq 0.05$  <sup>a</sup>: borderline significant at  $p \leq 0.05$

WSOD: Work Scheduling and Output Demands; PD: Physical Demands; MSD: Mental and Social Demands; FD: Flexibility Demands

Table S2: Trajectories of mental health problems from age 11 to 26: fit statistics of latent class growth models with increasing number of classes for internalising and externalising problems

|                        | Class    | Number of parameters | Log-likelihood | Bayes information criterion | Entropy     |
|------------------------|----------|----------------------|----------------|-----------------------------|-------------|
| Internalising problems | 3        | 41                   | 2817.9         | -5319.9                     | 0.65        |
|                        | <b>4</b> | <b>55</b>            | <b>3002.4</b>  | <b>-5580.9</b>              | <b>0.62</b> |
|                        | 5        | 69                   | 3132.2         | -5732.6                     | 0.63        |
| Externalising problems | 3        | 41                   | 4878.6         | -9441.1                     | 0.68        |
|                        | <b>4</b> | <b>55</b>            | <b>5135.5</b>  | <b>-9847.1</b>              | <b>0.64</b> |
|                        | 5        | 69                   | 5241.3         | -9950.7                     | 0.61        |

Note: used model is indicated in bold

Table S3: Regression analyses of trajectories of internalising and externalising problems from age 11 to age 26 on the total score of work functioning at age 29 with 'not applicable' considered as missing (N=914)

|                                           | Total          |            |
|-------------------------------------------|----------------|------------|
|                                           | Beta           | SE         |
| Intercept                                 | <b>75.3***</b> | <b>3.5</b> |
| Internalising problems (ref. low- stable) |                |            |
| High-stable                               | <b>-7.9***</b> | <b>1.7</b> |
| Moderate-stable                           | -2.5           | 1.6        |
| Decreasing                                | <b>-3.3*</b>   | <b>1.6</b> |
| Age (0 = mean)                            | -1.5           | 1.0        |
| Sex (ref. female)                         | -1.2           | 1.2        |
| Physical health                           | <b>1.9*</b>    | <b>0.8</b> |
| Educational level (ref. low)              |                |            |
| Medium                                    | <b>6.2**</b>   | <b>2.1</b> |
| High                                      | <b>7.7***</b>  | <b>2.1</b> |
| Intercept                                 | <b>74.5***</b> | <b>3.4</b> |
| Externalising problems (ref. low- stable) |                |            |
| High-stable                               | <b>-6.5***</b> | <b>1.8</b> |
| Moderate-stable                           | <b>-5.4***</b> | <b>1.6</b> |
| Decreasing                                | <b>-3.6*</b>   | <b>1.6</b> |
| Age (0 = mean)                            | -1.3           | 0.9        |
| Sex (ref. female)                         | 0.6            | 1.2        |
| Physical health                           | <b>2.2**</b>   | <b>0.8</b> |
| Educational level (ref. low)              |                |            |
| Medium                                    | <b>5.9**</b>   | <b>2.2</b> |
| High                                      | <b>7.6***</b>  | <b>2.1</b> |

\*\*\*:  $p \leq 0.001$  \*\*:  $p \leq 0.01$  \*:  $p \leq 0.05$
